# Supplementary material for: Theacrine alleviates sepsis-induced acute kidney injury by repressing the activation of NLRP3/Caspase-1 inflammasome
Source: PeerJ journal article supplement (doi:10.7717/peerj.14109), 2022-10-04
Supplement: fig2-raw_data.xlsx [file fig2-raw_data.xlsx]

## Sheet: A ELISA
The standard curve
x	BUN		OD	OD
0.109	0		0.106	0.112
0.113	3.1		0.118	0.108
0.229	6.2		0.231	0.227
0.321	12.5		0.328	0.314
0.532	25		0.541	0.523
0.956	50		0.959	0.953
1.896	100		1.899	1.893
3.779	200		3.782	3.776
OD
0.106	0.112	0.931	0.858	1.482	1.576
0.118	0.108	0.661	0.789
0.231	0.227	0.839	0.772
0.328	0.314	2.017	2.124
0.541	0.523	2.405	2.515
0.959	0.953	2.486	2.39
1.899	1.893	1.722	1.544
3.782	3.776	1.387	1.598
Explain
Negative control	Negative control	Saline1	Saline1	LPS+Theacrine-3	LPS+Theacrine-3
Positive control 3.1pg/ml	Positive control 3.1pg/ml	Saline2	Saline2
Positive control 6.2pg/ml	Positive control 6.2pg/ml	Saline3	Saline3
Positive control 12.5pg/ml	Positive control 12.5pg/ml	LPS-1	LPS-1
Positive control 25pg/ml	Positive control 25pg/ml	LPS-2	LPS-2
Positive control 50pg/ml	Positive control 50pg/ml	LPS-3	LPS-3
Positive control 100pg/ml	Positive control 100pg/ml	LPS+Theacrine-1	LPS+Theacrine-1
Positive control 200pg/ml	Positive control 200pg/ml	LPS+Theacrine-2	LPS+Theacrine-2

## Sheet: B ELISA
The standard curve
x	Serum creatinine		OD	OD
0.106	0		0.107	0.105
0.136	0.03		0.14	0.132
0.201	0.06		0.203	0.199
0.269	0.12		0.273	0.265
0.511	0.25		0.517	0.505
1.005	0.5		1.009	1.001
1.889	1		1.903	1.875
3.568	2		3.602	3.534
OD
0.107	0.105	0.427	0.357	0.567	0.689
0.14	0.132	0.304	2.055
0.203	0.199	0.392	2.002
0.273	0.265	0.759	1.022
0.517	0.505	0.899	1.897
1.009	1.001	0.829	0.672
1.903	1.875	0.549	0.286
3.602	3.534	0.654	1.932
Explain
Negative control	Negative control	Saline1	Saline1	LPS+Theacrine-3	LPS+Theacrine-3
Positive control 0.03pg/ml	Positive control 0.03pg/ml	Saline2	Saline2
Positive control 0.06pg/ml	Positive control 0.06pg/ml	Saline3	Saline3
Positive control 0.12pg/ml	Positive control 0.12pg/ml	LPS-1	LPS-1
Positive control 0.25pg/ml	Positive control 0.25pg/ml	LPS-2	LPS-2
Positive control 0.5pg/ml	Positive control 0.5pg/ml	LPS-3	LPS-3
Positive control 1pg/ml	Positive control 1pg/ml	LPS+Theacrine-1	LPS+Theacrine-1
Positive control 2pg/ml	Positive control 2pg/ml	LPS+Theacrine-2	LPS+Theacrine-2

## Sheet: fig2D
Area	Aisle	CT	TM	Type	Gene	The sample name
A01	FAM	10.73	80	Unknown	B-actin	Saline
A02	FAM	10.71	78.5	Unknown	B-actin	Saline
A03	FAM	10.72	78.5	Unknown	B-actin	Saline
A04	FAM	10.69	82	Unknown	B-actin	Saline
A05	FAM	10.68	81.5	Unknown	B-actin	Saline
A06	FAM	10.67	79	Unknown	B-actin	Saline
A07	FAM	10.62	79.5	Unknown	B-actin	Saline
A08	FAM	10.6	80.5	Unknown	B-actin	Saline
A09	FAM	10.6	79.5	Unknown	B-actin	Saline
A10	FAM	10.6	80	Unknown	B-actin	LPS
A11	FAM	10.59	81.5	Unknown	B-actin	LPS
A12	FAM	10.58	82	Unknown	B-actin	LPS
B01	FAM	10.56	80.5	Unknown	B-actin	LPS
B02	FAM	10.54	79	Unknown	B-actin	LPS
B03	FAM	10.54	78.5	Unknown	B-actin	LPS
B04	FAM	10.47	79	Unknown	B-actin	LPS
B05	FAM	10.48	80	Unknown	B-actin	LPS
B06	FAM	10.45	80.5	Unknown	B-actin	LPS
B07	FAM	10.44	81	Unknown	B-actin	LPS+Theacrine
B08	FAM	10.43	79.5	Unknown	B-actin	LPS+Theacrine
C01	FAM	10.42	80	Unknown	B-actin	LPS+Theacrine
C02	FAM	10.35	80	Unknown	B-actin	LPS+Theacrine
C03	FAM	10.37	78.5	Unknown	B-actin	LPS+Theacrine
C04	FAM	10.36	79	Unknown	B-actin	LPS+Theacrine
C05	FAM	10.27	80.5	Unknown	B-actin	LPS+Theacrine
C06	FAM	10.29	81	Unknown	B-actin	LPS+Theacrine
C07	FAM	10.27	81.5	Unknown	B-actin	LPS+Theacrine
C08	FAM	19.57	79	Unknown	IL-1B	Saline
D01	FAM	19.56	79.5	Unknown	IL-1B	Saline
D02	FAM	19.55	80	Unknown	IL-1B	Saline
D03	FAM	20.05	78.5	Unknown	IL-1B	Saline
D04	FAM	20.03	78.5	Unknown	IL-1B	Saline
D05	FAM	20.03	82	Unknown	IL-1B	Saline
D06	FAM	19.61	81.5	Unknown	IL-1B	Saline
D07	FAM	19.59	81.5	Unknown	IL-1B	Saline
D08	FAM	19.62	79	Unknown	IL-1B	Saline
E01	FAM	18.31	79.5	Unknown	IL-1B	LPS
E02	FAM	18.34	80.5	Unknown	IL-1B	LPS
E03	FAM	18.34	82	Unknown	IL-1B	LPS
E04	FAM	18.14	78	Unknown	IL-1B	LPS
E05	FAM	18.11	79	Unknown	IL-1B	LPS
E06	FAM	18.13	81.5	Unknown	IL-1B	LPS
E07	FAM	18	81.5	Unknown	IL-1B	LPS
E08	FAM	18.02	80	Unknown	IL-1B	LPS
F01	FAM	18.02	79	Unknown	IL-1B	LPS
F02	FAM	18.87	80.5	Unknown	IL-1B	LPS+Theacrine
F03	FAM	18.9	82	Unknown	IL-1B	LPS+Theacrine
F04	FAM	18.89	79.5	Unknown	IL-1B	LPS+Theacrine
F05	FAM	18.57	78	Unknown	IL-1B	LPS+Theacrine
F06	FAM	18.54	79.5	Unknown	IL-1B	LPS+Theacrine
F07	FAM	18.54	81	Unknown	IL-1B	LPS+Theacrine
F08	FAM	18.66	80.5	Unknown	IL-1B	LPS+Theacrine
G01	FAM	18.66	81.5	Unknown	IL-1B	LPS+Theacrine
G02	FAM	18.67	79	Unknown	IL-1B	LPS+Theacrine

## Sheet: fig2E
Area	Aisle	CT	TM	Type	Gene	The sample name
A01	FAM	12.63	79.5	Unknown	B-actin	Saline
A02	FAM	12.64	80	Unknown	B-actin	Saline
A03	FAM	12.64	80	Unknown	B-actin	Saline
A04	FAM	12.6	78.5	Unknown	B-actin	Saline
A05	FAM	12.61	78.5	Unknown	B-actin	Saline
A06	FAM	12.62	81	Unknown	B-actin	Saline
A07	FAM	12.58	79.5	Unknown	B-actin	Saline
A08	FAM	12.58	81.5	Unknown	B-actin	Saline
A09	FAM	12.59	82	Unknown	B-actin	Saline
A10	FAM	12.56	78.5	Unknown	B-actin	LPS
A11	FAM	12.54	80	Unknown	B-actin	LPS
A12	FAM	12.55	79.5	Unknown	B-actin	LPS
B01	FAM	12.46	82	Unknown	B-actin	LPS
B02	FAM	12.48	81	Unknown	B-actin	LPS
B03	FAM	12.46	78.5	Unknown	B-actin	LPS
B04	FAM	12.39	78.5	Unknown	B-actin	LPS
B05	FAM	12.41	82	Unknown	B-actin	LPS
B06	FAM	12.4	79	Unknown	B-actin	LPS
B07	FAM	12.36	80.5	Unknown	B-actin	LPS+Theacrine
B08	FAM	12.34	81.5	Unknown	B-actin	LPS+Theacrine
C01	FAM	12.36	78	Unknown	B-actin	LPS+Theacrine
C02	FAM	12.26	79.5	Unknown	B-actin	LPS+Theacrine
C03	FAM	12.28	78.5	Unknown	B-actin	LPS+Theacrine
C04	FAM	12.26	82	Unknown	B-actin	LPS+Theacrine
C05	FAM	12.25	81.5	Unknown	B-actin	LPS+Theacrine
C06	FAM	12.25	80	Unknown	B-actin	LPS+Theacrine
C07	FAM	12.23	79.5	Unknown	B-actin	LPS+Theacrine
C08	FAM	20.21	79.5	Unknown	IL-18	Saline
D01	FAM	20.22	80	Unknown	IL-18	Saline
D02	FAM	20.23	81	Unknown	IL-18	Saline
D03	FAM	20.54	81.5	Unknown	IL-18	Saline
D04	FAM	20.53	82	Unknown	IL-18	Saline
D05	FAM	20.56	79.5	Unknown	IL-18	Saline
D06	FAM	20.34	80	Unknown	IL-18	Saline
D07	FAM	20.33	79.5	Unknown	IL-18	Saline
D08	FAM	20.33	82	Unknown	IL-18	Saline
E01	FAM	18.98	78.5	Unknown	IL-18	LPS
E02	FAM	19	78.5	Unknown	IL-18	LPS
E03	FAM	18.97	82	Unknown	IL-18	LPS
E04	FAM	18.92	81.5	Unknown	IL-18	LPS
E05	FAM	18.93	80	Unknown	IL-18	LPS
E06	FAM	18.92	79.5	Unknown	IL-18	LPS
E07	FAM	19.02	81	Unknown	IL-18	LPS
E08	FAM	19.01	81	Unknown	IL-18	LPS
F01	FAM	19.02	78.5	Unknown	IL-18	LPS
F02	FAM	19.34	79	Unknown	IL-18	LPS+Theacrine
F03	FAM	19.36	79.5	Unknown	IL-18	LPS+Theacrine
F04	FAM	19.35	82	Unknown	IL-18	LPS+Theacrine
F05	FAM	19.56	81.5	Unknown	IL-18	LPS+Theacrine
F06	FAM	19.58	80.5	Unknown	IL-18	LPS+Theacrine
F07	FAM	19.59	78	Unknown	IL-18	LPS+Theacrine
F08	FAM	19.4	78	Unknown	IL-18	LPS+Theacrine
G01	FAM	19.41	79.5	Unknown	IL-18	LPS+Theacrine
G02	FAM	19.42	82	Unknown	IL-18	LPS+Theacrine

## Sheet: fig2G
	Saline	LPS	LPS+Theacrine
	2	18	12
	3	21	9
	4	19	11
Mean	3	19.3333	10.6667
SD	1	1.52753	1.52753
