# Supplementary material for: Theacrine alleviates sepsis-induced acute kidney injury by repressing the activation of NLRP3/Caspase-1 inflammasome
Source: PeerJ journal article supplement (doi:10.7717/peerj.14109), 2022-10-04
Supplement: fig3-raw_data.xlsx [file fig3-raw_data.xlsx]

## Sheet: fig3A
	0	1	2	4	8	10
	100	101.5	74.2	65.3	42.8	21.3
	96.3	91.7	61.4	54.7	35.5	26.1
	104.7	98.3	65.6	63.6	41.7	27.6
Mean	100.333	97.1667	67.0667	61.2	40	25
SD	4.20991	4.99733	6.52482	5.69298	3.93573	3.2909

## Sheet: fig3B
	0	8	12	24	36
	100	81.3	76.5	74.2	33.9
	98.3	76.5	79.9	61.4	35.5
	101.7	85.5	72.8	65.6	41.7
Mean	100	81.1	76.4	67.0667	37.0333
SD	1.7	4.50333	3.55106	6.52482	4.11987

## Sheet: fig3C
	Control	LPS	LPS+Theacrine
	100	71	76.5
	98.3	57.3	79.9
	89	65.6	89
Mean	95.7667	64.6333	81.8
SD	5.92143	6.90097	6.46297

## Sheet: fig3E
	Control	LPS	LPS+Theacrine
	2	18	7
	3	16	9
	2	16	9
Mean	2.33333	16.6667	8.33333
SD	0.57735	1.1547	1.1547

## Sheet: fig3F
Area	Aisle	CT	TM	Type	Gene	The sample name
A01	FAM	10.73	80.5	Unknown	B-actin	Control
A02	FAM	10.71	78.5	Unknown	B-actin	Control
A03	FAM	10.71	82	Unknown	B-actin	Control
A04	FAM	10.68	81.5	Unknown	B-actin	Control
A05	FAM	10.66	79	Unknown	B-actin	Control
A06	FAM	10.69	80.5	Unknown	B-actin	Control
A07	FAM	10.64	80.5	Unknown	B-actin	Control
A08	FAM	10.61	79	Unknown	B-actin	Control
A09	FAM	10.61	78.5	Unknown	B-actin	Control
A10	FAM	10.59	79.5	Unknown	B-actin	LPS
A11	FAM	10.58	80	Unknown	B-actin	LPS
A12	FAM	10.57	82	Unknown	B-actin	LPS
B01	FAM	10.51	81	Unknown	B-actin	LPS
B02	FAM	10.51	81.5	Unknown	B-actin	LPS
B03	FAM	10.5	80	Unknown	B-actin	LPS
B04	FAM	10.46	79.5	Unknown	B-actin	LPS
B05	FAM	10.46	78	Unknown	B-actin	LPS
B06	FAM	10.48	80	Unknown	B-actin	LPS
B07	FAM	10.43	81.5	Unknown	B-actin	LPS+Theacrine
B08	FAM	10.43	81.5	Unknown	B-actin	LPS+Theacrine
C01	FAM	10.41	79	Unknown	B-actin	LPS+Theacrine
C02	FAM	10.37	80.5	Unknown	B-actin	LPS+Theacrine
C03	FAM	10.4	80.5	Unknown	B-actin	LPS+Theacrine
C04	FAM	10.37	78	Unknown	B-actin	LPS+Theacrine
C05	FAM	10.28	79	Unknown	B-actin	LPS+Theacrine
C06	FAM	10.28	81.5	Unknown	B-actin	LPS+Theacrine
C07	FAM	10.3	79	Unknown	B-actin	LPS+Theacrine
C08	FAM	19.94	78	Unknown	IL-1B	Control
D01	FAM	19.95	80.5	Unknown	IL-1B	Control
D02	FAM	19.97	79	Unknown	IL-1B	Control
D03	FAM	20.01	79.5	Unknown	IL-1B	Control
D04	FAM	19.99	80.5	Unknown	IL-1B	Control
D05	FAM	20	79	Unknown	IL-1B	Control
D06	FAM	20.1	79	Unknown	IL-1B	Control
D07	FAM	20.11	80.5	Unknown	IL-1B	Control
D08	FAM	20.12	81	Unknown	IL-1B	Control
E01	FAM	18.47	81.5	Unknown	IL-1B	LPS
E02	FAM	18.45	82	Unknown	IL-1B	LPS
E03	FAM	18.48	79	Unknown	IL-1B	LPS
E04	FAM	18.37	81.5	Unknown	IL-1B	LPS
E05	FAM	18.39	79	Unknown	IL-1B	LPS
E06	FAM	18.37	82	Unknown	IL-1B	LPS
E07	FAM	18.41	78.5	Unknown	IL-1B	LPS
E08	FAM	18.41	79.58	Unknown	IL-1B	LPS
F01	FAM	18.42	81	Unknown	IL-1B	LPS
F02	FAM	19.07	80.5	Unknown	IL-1B	LPS+Theacrine
F03	FAM	19.08	80.5	Unknown	IL-1B	LPS+Theacrine
F04	FAM	19.09	79	Unknown	IL-1B	LPS+Theacrine
F05	FAM	19.17	78.5	Unknown	IL-1B	LPS+Theacrine
F06	FAM	19.19	82	Unknown	IL-1B	LPS+Theacrine
F07	FAM	19.2	79.5	Unknown	IL-1B	LPS+Theacrine
F08	FAM	18.99	80	Unknown	IL-1B	LPS+Theacrine
G01	FAM	18.98	79.5	Unknown	IL-1B	LPS+Theacrine
G02	FAM	18.97	78.5	Unknown	IL-1B	LPS+Theacrine

## Sheet: fig3G
Area	Aisle	CT	TM	Type	Gene	The sample name
A01	FAM	11.54	81	Unknown	B-actin	Control
A02	FAM	11.56	81.5	Unknown	B-actin	Control
A03	FAM	11.53	80.5	Unknown	B-actin	Control
A04	FAM	11.53	79	Unknown	B-actin	Control
A05	FAM	11.5	78	Unknown	B-actin	Control
A06	FAM	11.52	80.5	Unknown	B-actin	Control
A07	FAM	11.5	79	Unknown	B-actin	Control
A08	FAM	11.48	79.5	Unknown	B-actin	Control
A09	FAM	11.5	80.5	Unknown	B-actin	Control
A10	FAM	11.4	81.5	Unknown	B-actin	LPS
A11	FAM	11.39	78	Unknown	B-actin	LPS
A12	FAM	11.4	80.5	Unknown	B-actin	LPS
B01	FAM	11.38	80.5	Unknown	B-actin	LPS
B02	FAM	11.37	79	Unknown	B-actin	LPS
B03	FAM	11.4	79.5	Unknown	B-actin	LPS
B04	FAM	11.35	82	Unknown	B-actin	LPS
B05	FAM	11.37	81.5	Unknown	B-actin	LPS
B06	FAM	11.35	79.5	Unknown	B-actin	LPS
B07	FAM	11.31	80	Unknown	B-actin	LPS+Theacrine
B08	FAM	11.33	78	Unknown	B-actin	LPS+Theacrine
C01	FAM	11.32	79.5	Unknown	B-actin	LPS+Theacrine
C02	FAM	11.28	80	Unknown	B-actin	LPS+Theacrine
C03	FAM	11.27	78.5	Unknown	B-actin	LPS+Theacrine
C04	FAM	11.25	79.5	Unknown	B-actin	LPS+Theacrine
C05	FAM	11.23	80	Unknown	B-actin	LPS+Theacrine
C06	FAM	11.21	81	Unknown	B-actin	LPS+Theacrine
C07	FAM	11.23	80.5	Unknown	B-actin	LPS+Theacrine
C08	FAM	20.24	79	Unknown	IL-18	Control
D01	FAM	20.23	81	Unknown	IL-18	Control
D02	FAM	20.23	80.5	Unknown	IL-18	Control
D03	FAM	20.45	80.5	Unknown	IL-18	Control
D04	FAM	20.45	79	Unknown	IL-18	Control
D05	FAM	20.46	82	Unknown	IL-18	Control
D06	FAM	20.39	79.5	Unknown	IL-18	Control
D07	FAM	20.37	80	Unknown	IL-18	Control
D08	FAM	20.37	79.5	Unknown	IL-18	Control
E01	FAM	18.9	79.5	Unknown	IL-18	LPS
E02	FAM	18.93	80.5	Unknown	IL-18	LPS
E03	FAM	18.92	80	Unknown	IL-18	LPS
E04	FAM	18.79	79	Unknown	IL-18	LPS
E05	FAM	18.78	80	Unknown	IL-18	LPS
E06	FAM	18.8	79.5	Unknown	IL-18	LPS
E07	FAM	18.8	82	Unknown	IL-18	LPS
E08	FAM	18.81	78.5	Unknown	IL-18	LPS
F01	FAM	18.8	78.5	Unknown	IL-18	LPS
F02	FAM	19.46	80	Unknown	IL-18	LPS+Theacrine
F03	FAM	19.48	82	Unknown	IL-18	LPS+Theacrine
F04	FAM	19.47	81.5	Unknown	IL-18	LPS+Theacrine
F05	FAM	19.25	79	Unknown	IL-18	LPS+Theacrine
F06	FAM	19.26	81	Unknown	IL-18	LPS+Theacrine
F07	FAM	19.24	80.5	Unknown	IL-18	LPS+Theacrine
F08	FAM	19.34	79	Unknown	IL-18	LPS+Theacrine
G01	FAM	19.32	79.5	Unknown	IL-18	LPS+Theacrine
G02	FAM	19.34	80.5	Unknown	IL-18	LPS+Theacrine
