# Supplementary material for: Theacrine alleviates sepsis-induced acute kidney injury by repressing the activation of NLRP3/Caspase-1 inflammasome
Source: PeerJ journal article supplement (doi:10.7717/peerj.14109), 2022-10-04
Supplement: fig4-raw_data.xlsx [file fig4-raw_data.xlsx]

## Sheet: fig4A
Area	Aisle	CT	TM	Type	Gene	The sample name
A01	FAM	11.84	78.5	Unknown	B-actin	Control
A02	FAM	11.82	78.5	Unknown	B-actin	Control
A03	FAM	11.81	81	Unknown	B-actin	Control
A04	FAM	11.79	80.5	Unknown	B-actin	Control
A05	FAM	11.81	79	Unknown	B-actin	Control
A06	FAM	11.81	80.5	Unknown	B-actin	Control
A07	FAM	11.8	82	Unknown	B-actin	Control
A08	FAM	11.78	79.5	Unknown	B-actin	Control
A09	FAM	11.79	81	Unknown	B-actin	Control
A10	FAM	11.73	81	Unknown	B-actin	LPS
A11	FAM	11.76	78.5	Unknown	B-actin	LPS
A12	FAM	11.75	79	Unknown	B-actin	LPS
B01	FAM	11.71	80.5	Unknown	B-actin	LPS
B02	FAM	11.7	81.5	Unknown	B-actin	LPS
B03	FAM	11.73	82	Unknown	B-actin	LPS
B04	FAM	11.68	79.5	Unknown	B-actin	LPS
B05	FAM	11.67	80.5	Unknown	B-actin	LPS
B06	FAM	11.69	70	Unknown	B-actin	LPS
B07	FAM	11.63	80.5	Unknown	B-actin	LPS+Theacrine
B08	FAM	11.64	81.5	Unknown	B-actin	LPS+Theacrine
B09	FAM	11.64	80	Unknown	B-actin	LPS+Theacrine
B10	FAM	11.6	79	Unknown	B-actin	LPS+Theacrine
B11	FAM	11.58	80.5	Unknown	B-actin	LPS+Theacrine
B12	FAM	11.59	81	Unknown	B-actin	LPS+Theacrine
C01	FAM	11.54	81.5	Unknown	B-actin	LPS+Theacrine
C02	FAM	11.53	82	Unknown	B-actin	LPS+Theacrine
C03	FAM	11.51	79	Unknown	B-actin	LPS+Theacrine
C04	FAM	19.62	80.5	Unknown	NLRP3	Control
C05	FAM	19.63	81	Unknown	NLRP3	Control
C06	FAM	19.64	80.5	Unknown	NLRP3	Control
C07	FAM	19.81	79	Unknown	NLRP3	Control
C08	FAM	19.82	80	Unknown	NLRP3	Control
C09	FAM	19.83	78.5	Unknown	NLRP3	Control
C10	FAM	19.8	78.5	Unknown	NLRP3	Control
C11	FAM	19.78	82	Unknown	NLRP3	Control
C12	FAM	19.79	78	Unknown	NLRP3	Control
D01	FAM	18.14	79	Unknown	NLRP3	LPS
D02	FAM	18.15	81.5	Unknown	NLRP3	LPS
D03	FAM	18.15	81	Unknown	NLRP3	LPS
D04	FAM	18.04	79.5	Unknown	NLRP3	LPS
D05	FAM	18.04	82	Unknown	NLRP3	LPS
D06	FAM	18.02	79	Unknown	NLRP3	LPS
D07	FAM	17.92	80.5	Unknown	NLRP3	LPS
D08	FAM	17.91	81.5	Unknown	NLRP3	LPS
D09	FAM	17.89	82	Unknown	NLRP3	LPS
D10	FAM	18.6	79.5	Unknown	NLRP3	LPS+Theacrine
D11	FAM	18.59	81	Unknown	NLRP3	LPS+Theacrine
D12	FAM	18.58	79.5	Unknown	NLRP3	LPS+Theacrine
E01	FAM	18.53	82	Unknown	NLRP3	LPS+Theacrine
E02	FAM	18.55	81.5	Unknown	NLRP3	LPS+Theacrine
E03	FAM	18.56	80	Unknown	NLRP3	LPS+Theacrine
E04	FAM	18.37	78	Unknown	NLRP3	LPS+Theacrine
E05	FAM	18.39	79.5	Unknown	NLRP3	LPS+Theacrine
E06	FAM	18.38	79.5	Unknown	NLRP3	LPS+Theacrine

## Sheet: fig4BCD-wb
OD
NLRP3	0.21	0.49	0.33
	0.22	0.53	0.35
	0.23	0.55	0.33
CAS-1	0.11	0.28	0.18
	0.12	0.28	0.18
	0.13	0.3	0.19
Caspase-1	0.74	0.79	0.77
	0.76	0.76	0.74
	0.78	0.75	0.73
β-actin	0.78	0.77	0.78
	0.75	0.76	0.76
	0.79	0.79	0.74
