# Supplementary material for: Theacrine alleviates sepsis-induced acute kidney injury by repressing the activation of NLRP3/Caspase-1 inflammasome
Source: PeerJ journal article supplement (doi:10.7717/peerj.14109), 2022-10-04
Supplement: fig5-raw_data.xlsx [file fig5-raw_data.xlsx]

## Sheet: fig5A
Area	Aisle	CT	TM	Type	Gene	The sample name
A01	FAM	8.89	79.5	Unknown	B-actin	Control
A02	FAM	8.87	80	Unknown	B-actin	Control
A03	FAM	8.89	80.5	Unknown	B-actin	Control
A04	FAM	8.82	79	Unknown	B-actin	Control
A05	FAM	8.81	80.5	Unknown	B-actin	Control
A06	FAM	8.84	81	Unknown	B-actin	Control
A07	FAM	8.78	81.5	Unknown	B-actin	Control
A08	FAM	8.75	79	Unknown	B-actin	Control
A09	FAM	8.75	82	Unknown	B-actin	Control
A10	FAM	8.69	79.5	Unknown	B-actin	LPS
A11	FAM	8.72	80.5	Unknown	B-actin	LPS
A12	FAM	8.71	78	Unknown	B-actin	LPS
B01	FAM	8.67	79	Unknown	B-actin	LPS
B02	FAM	8.67	80	Unknown	B-actin	LPS
B03	FAM	8.65	81.5	Unknown	B-actin	LPS
B04	FAM	8.6	81	Unknown	B-actin	LPS
B05	FAM	8.6	79.5	Unknown	B-actin	LPS
B06	FAM	8.61	82	Unknown	B-actin	LPS
B07	FAM	8.58	80.5	Unknown	B-actin	LPS+Theacrine
B08	FAM	8.6	80.5	Unknown	B-actin	LPS+Theacrine
C01	FAM	8.6	81	Unknown	B-actin	LPS+Theacrine
C02	FAM	8.54	79	Unknown	B-actin	LPS+Theacrine
C03	FAM	8.54	80.5	Unknown	B-actin	LPS+Theacrine
C04	FAM	8.55	81	Unknown	B-actin	LPS+Theacrine
C05	FAM	8.45	79.5	Unknown	B-actin	LPS+Theacrine
C06	FAM	8.44	78.5	Unknown	B-actin	LPS+Theacrine
C07	FAM	8.45	81	Unknown	B-actin	LPS+Theacrine
C08	FAM	20.65	80.5	Unknown	IL-1B	Control
D01	FAM	20.67	81	Unknown	IL-1B	Control
D02	FAM	20.67	79.5	Unknown	IL-1B	Control
D03	FAM	20.68	79.5	Unknown	IL-1B	Control
D04	FAM	20.71	80	Unknown	IL-1B	Control
D05	FAM	20.68	78	Unknown	IL-1B	Control
D06	FAM	20.78	80.5	Unknown	IL-1B	Control
D07	FAM	20.79	82	Unknown	IL-1B	Control
D08	FAM	20.77	79.5	Unknown	IL-1B	Control
E01	FAM	19.17	78	Unknown	IL-1B	LPS
E02	FAM	19.15	80.5	Unknown	IL-1B	LPS
E03	FAM	19.17	81.5	Unknown	IL-1B	LPS
E04	FAM	18.99	79	Unknown	IL-1B	LPS
E05	FAM	18.98	80	Unknown	IL-1B	LPS
E06	FAM	19.01	81.5	Unknown	IL-1B	LPS
E07	FAM	18.95	82	Unknown	IL-1B	LPS
E08	FAM	18.98	78.5	Unknown	IL-1B	LPS
F01	FAM	18.97	79	Unknown	IL-1B	LPS
F02	FAM	19.75	80.5	Unknown	IL-1B	LPS+Theacrine
F03	FAM	19.77	81	Unknown	IL-1B	LPS+Theacrine
F04	FAM	19.77	78.5	Unknown	IL-1B	LPS+Theacrine
F05	FAM	19.76	79	Unknown	IL-1B	LPS+Theacrine
F06	FAM	19.75	81.5	Unknown	IL-1B	LPS+Theacrine
F07	FAM	19.75	81.5	Unknown	IL-1B	LPS+Theacrine
F08	FAM	19.48	80	Unknown	IL-1B	LPS+Theacrine
G01	FAM	19.5	79.5	Unknown	IL-1B	LPS+Theacrine
G02	FAM	19.48	78	Unknown	IL-1B	LPS+Theacrine

## Sheet: fig5B
Area	Aisle	CT	TM	Type	Gene	The sample name
A01	FAM	12.73	78	Unknown	B-actin	Control
A02	FAM	12.71	79.5	Unknown	B-actin	Control
A03	FAM	12.72	82	Unknown	B-actin	Control
A04	FAM	12.69	78.5	Unknown	B-actin	Control
A05	FAM	12.71	81	Unknown	B-actin	Control
A06	FAM	12.72	78.5	Unknown	B-actin	Control
A07	FAM	12.65	78.5	Unknown	B-actin	Control
A08	FAM	12.65	82	Unknown	B-actin	Control
A09	FAM	12.67	79.5	Unknown	B-actin	Control
A10	FAM	12.62	80	Unknown	B-actin	LPS
A11	FAM	12.65	79.5	Unknown	B-actin	LPS
A12	FAM	12.64	82	Unknown	B-actin	LPS
B01	FAM	12.6	78	Unknown	B-actin	LPS
B02	FAM	12.58	78	Unknown	B-actin	LPS
B03	FAM	12.6	80.5	Unknown	B-actin	LPS
B04	FAM	12.53	81	Unknown	B-actin	LPS
B05	FAM	12.55	79.5	Unknown	B-actin	LPS
B06	FAM	12.55	82	Unknown	B-actin	LPS
B07	FAM	12.49	80.5	Unknown	B-actin	LPS+Theacrine
B08	FAM	12.47	79.5	Unknown	B-actin	LPS+Theacrine
C01	FAM	12.47	81	Unknown	B-actin	LPS+Theacrine
C02	FAM	12.42	79.5	Unknown	B-actin	LPS+Theacrine
C03	FAM	12.45	82	Unknown	B-actin	LPS+Theacrine
C04	FAM	12.43	78.5	Unknown	B-actin	LPS+Theacrine
C05	FAM	12.37	80	Unknown	B-actin	LPS+Theacrine
C06	FAM	12.34	81	Unknown	B-actin	LPS+Theacrine
C07	FAM	12.37	78.5	Unknown	B-actin	LPS+Theacrine
C08	FAM	21.04	79.5	Unknown	IL-18	Control
D01	FAM	21.07	80	Unknown	IL-18	Control
D02	FAM	21.04	81	Unknown	IL-18	Control
D03	FAM	21.06	80.5	Unknown	IL-18	Control
D04	FAM	21.08	82	Unknown	IL-18	Control
D05	FAM	21.08	81.5	Unknown	IL-18	Control
D06	FAM	21.13	79	Unknown	IL-18	Control
D07	FAM	21.15	79	Unknown	IL-18	Control
D08	FAM	21.12	78.5	Unknown	IL-18	Control
E01	FAM	19.55	79.5	Unknown	IL-18	LPS
E02	FAM	19.55	80	Unknown	IL-18	LPS
E03	FAM	19.57	81.5	Unknown	IL-18	LPS
E04	FAM	19.63	81.5	Unknown	IL-18	LPS
E05	FAM	19.6	80	Unknown	IL-18	LPS
E06	FAM	19.61	79	Unknown	IL-18	LPS
E07	FAM	19.41	78.5	Unknown	IL-18	LPS
E08	FAM	19.43	79.5	Unknown	IL-18	LPS
F01	FAM	19.42	81	Unknown	IL-18	LPS
F02	FAM	20.34	79.5	Unknown	IL-18	LPS+Theacrine
F03	FAM	20.33	81	Unknown	IL-18	LPS+Theacrine
F04	FAM	20.32	81	Unknown	IL-18	LPS+Theacrine
F05	FAM	20.18	79.5	Unknown	IL-18	LPS+Theacrine
F06	FAM	20.16	80.5	Unknown	IL-18	LPS+Theacrine
F07	FAM	20.18	81	Unknown	IL-18	LPS+Theacrine
F08	FAM	20.22	78.5	Unknown	IL-18	LPS+Theacrine
G01	FAM	20.24	79	Unknown	IL-18	LPS+Theacrine
G02	FAM	20.24	80	Unknown	IL-18	LPS+Theacrine
