# Supplementary material for: Theacrine alleviates sepsis-induced acute kidney injury by repressing the activation of NLRP3/Caspase-1 inflammasome
Source: PeerJ journal article supplement (doi:10.7717/peerj.14109), 2022-10-04
Supplement: fig6-raw_data.xlsx [file fig6-raw_data.xlsx]

## Sheet: fig6A
The standard curve
x	BUN		OD	OD
0.123	0		0.119	0.127
0.216	3.1		0.219	0.213
0.319	6.2		0.315	0.323
0.412	12.5		0.417	0.407
0.673	25		0.682	0.664
1.133	50		1.142	1.124
2.113	100		2.123	2.103
3.886	200		3.889	3.883
OD
0.119	0.127	1.905	1.86
0.219	0.213	1.521	1.592
0.315	0.323	1.557	1.868
0.417	0.407	2.215	2.244
0.682	0.664	2.481	2.172
1.142	1.124	2.61	2.417
2.123	2.103
3.889	3.883
Explain
Negative control	Negative control	LPS+Theacrine1	LPS+Theacrine1
Positive control 3.1pg/ml	Positive control 3.1pg/ml	LPS+Theacrine2	LPS+Theacrine2
Positive control 6.2pg/ml	Positive control 6.2pg/ml	LPS+Theacrine3	LPS+Theacrine3
Positive control 12.5pg/ml	Positive control 12.5pg/ml	LPS+Theacrine+SCC1	LPS+Theacrine+SCC1
Positive control 25pg/ml	Positive control 25pg/ml	LPS+Theacrine+SCC2	LPS+Theacrine+SCC2
Positive control 50pg/ml	Positive control 50pg/ml	LPS+Theacrine+SCC3	LPS+Theacrine+SCC3
Positive control 100pg/ml	Positive control 100pg/ml
Positive control 200pg/ml	Positive control 200pg/ml

## Sheet: fig6B
The standard curve
x	Serum creatinine		OD	OD
0.106	0		0.108	0.104
0.233	0.01		0.236	0.23
0.331	0.03		0.338	0.324
0.498	0.06		0.503	0.493
0.668	0.125		0.671	0.665
1.135	0.25		1.138	1.132
2.036	0.5		2.039	2.033
3.706	1		3.712	3.7
OD
0.108	0.104	1.065	1.242
0.236	0.23	1.242	2.162
0.338	0.324	1.207	1.454
0.503	0.493	1.596	1.666
0.671	0.665	1.843	2.056
1.138	1.132	1.879	1.56
2.039	2.033
3.712	3.7
Explain
Negative control	Negative control	LPS+Theacrine1	LPS+Theacrine1
Positive control 0.01pg/ml	Positive control 0.01pg/ml	LPS+Theacrine2	LPS+Theacrine2
Positive control 0.03pg/ml	Positive control 0.03pg/ml	LPS+Theacrine3	LPS+Theacrine3
Positive control 0.06pg/ml	Positive control 0.06pg/ml	LPS+Theacrine+SCC1	LPS+Theacrine+SCC1
Positive control 0.125pg/ml	Positive control 0.125pg/ml	LPS+Theacrine+SCC2	LPS+Theacrine+SCC2
Positive control 0.25pg/ml	Positive control 0.25pg/ml	LPS+Theacrine+SCC3	LPS+Theacrine+SCC3
Positive control 0.5pg/ml	Positive control 0.5pg/ml
Positive control 1pg/ml	Positive control 1pg/ml

## Sheet: fig6C
Area	Aisle	CT	TM	Type	Gene	The sample name
A01	FAM	10.61	81.5	Unknown	B-actin	LPS+Theacrine
A02	FAM	10.63	80	Unknown	B-actin	LPS+Theacrine
A03	FAM	10.63	80	Unknown	B-actin	LPS+Theacrine
A04	FAM	10.6	79.5	Unknown	B-actin	LPS+Theacrine
A05	FAM	10.59	82	Unknown	B-actin	LPS+Theacrine
A06	FAM	10.57	81.5	Unknown	B-actin	LPS+Theacrine
A07	FAM	10.53	80	Unknown	B-actin	LPS+Theacrine
A08	FAM	10.51	79.5	Unknown	B-actin	LPS+Theacrine
A09	FAM	10.53	78.5	Unknown	B-actin	LPS+Theacrine
A10	FAM	10.47	80	Unknown	B-actin	LPS+Theacrine+NSS
A11	FAM	10.47	79.5	Unknown	B-actin	LPS+Theacrine+NSS
A12	FAM	10.48	81	Unknown	B-actin	LPS+Theacrine+NSS
B01	FAM	10.38	81.5	Unknown	B-actin	LPS+Theacrine+NSS
B02	FAM	10.39	78	Unknown	B-actin	LPS+Theacrine+NSS
B03	FAM	10.36	79.5	Unknown	B-actin	LPS+Theacrine+NSS
B04	FAM	10.34	79.5	Unknown	B-actin	LPS+Theacrine+NSS
B05	FAM	10.35	80	Unknown	B-actin	LPS+Theacrine+NSS
B06	FAM	10.33	81.5	Unknown	B-actin	LPS+Theacrine+NSS
B07	FAM	20.12	80	Unknown	IL-1B	LPS+Theacrine
B08	FAM	20.14	78.5	Unknown	IL-1B	LPS+Theacrine
C01	FAM	20.14	82	Unknown	IL-1B	LPS+Theacrine
C02	FAM	20.14	79.5	Unknown	IL-1B	LPS+Theacrine
C03	FAM	20.16	80	Unknown	IL-1B	LPS+Theacrine
C04	FAM	20.13	81.5	Unknown	IL-1B	LPS+Theacrine
C05	FAM	20.15	79.5	Unknown	IL-1B	LPS+Theacrine
C06	FAM	20.14	78	Unknown	IL-1B	LPS+Theacrine
C07	FAM	20.15	79.5	Unknown	IL-1B	LPS+Theacrine
C08	FAM	18.55	81	Unknown	IL-1B	LPS+Theacrine+NSS
D01	FAM	18.55	81	Unknown	IL-1B	LPS+Theacrine+NSS
D02	FAM	18.56	79.5	Unknown	IL-1B	LPS+Theacrine+NSS
D03	FAM	18.38	78.5	Unknown	IL-1B	LPS+Theacrine+NSS
D04	FAM	18.36	80	Unknown	IL-1B	LPS+Theacrine+NSS
D05	FAM	18.36	78.5	Unknown	IL-1B	LPS+Theacrine+NSS
D06	FAM	18.34	82	Unknown	IL-1B	LPS+Theacrine+NSS
D07	FAM	18.35	80.5	Unknown	IL-1B	LPS+Theacrine+NSS
D08	FAM	18.36	80.5	Unknown	IL-1B	LPS+Theacrine+NSS

## Sheet: fig6D
Area	Aisle	CT	TM	Type	Gene	The sample name
A01	FAM	9.77	80.5	Unknown	B-actin	LPS+Theacrine
A02	FAM	9.75	81	Unknown	B-actin	LPS+Theacrine
A03	FAM	9.78	79.5	Unknown	B-actin	LPS+Theacrine
A04	FAM	9.72	79.5	Unknown	B-actin	LPS+Theacrine
A05	FAM	9.71	82	Unknown	B-actin	LPS+Theacrine
A06	FAM	9.73	78	Unknown	B-actin	LPS+Theacrine
A07	FAM	9.7	79.5	Unknown	B-actin	LPS+Theacrine
A08	FAM	9.68	81	Unknown	B-actin	LPS+Theacrine
A09	FAM	9.68	81.5	Unknown	B-actin	LPS+Theacrine
A10	FAM	9.62	82	Unknown	B-actin	LPS+Theacrine+SCC
A11	FAM	9.64	79.5	Unknown	B-actin	LPS+Theacrine+SCC
A12	FAM	9.63	80	Unknown	B-actin	LPS+Theacrine+SCC
B01	FAM	9.58	81.5	Unknown	B-actin	LPS+Theacrine+SCC
B02	FAM	9.57	81.5	Unknown	B-actin	LPS+Theacrine+SCC
B03	FAM	9.58	79	Unknown	B-actin	LPS+Theacrine+SCC
B04	FAM	9.56	80	Unknown	B-actin	LPS+Theacrine+SCC
B05	FAM	9.53	78.5	Unknown	B-actin	LPS+Theacrine+SCC
B06	FAM	9.55	79.5	Unknown	B-actin	LPS+Theacrine+SCC
B07	FAM	20.36	80	Unknown	IL-18	LPS+Theacrine
B08	FAM	20.36	78	Unknown	IL-18	LPS+Theacrine
C01	FAM	20.35	78.5	Unknown	IL-18	LPS+Theacrine
C02	FAM	20.44	81	Unknown	IL-18	LPS+Theacrine
C03	FAM	20.44	82	Unknown	IL-18	LPS+Theacrine
C04	FAM	20.46	81.5	Unknown	IL-18	LPS+Theacrine
C05	FAM	20.46	79	Unknown	IL-18	LPS+Theacrine
C06	FAM	20.48	80.5	Unknown	IL-18	LPS+Theacrine
C07	FAM	20.46	79	Unknown	IL-18	LPS+Theacrine
C08	FAM	18.73	78	Unknown	IL-18	LPS+Theacrine+SCC
D01	FAM	18.72	80.5	Unknown	IL-18	LPS+Theacrine+SCC
D02	FAM	18.72	82	Unknown	IL-18	LPS+Theacrine+SCC
D03	FAM	18.69	81.5	Unknown	IL-18	LPS+Theacrine+SCC
D04	FAM	18.69	79	Unknown	IL-18	LPS+Theacrine+SCC
D05	FAM	18.67	81.5	Unknown	IL-18	LPS+Theacrine+SCC
D06	FAM	18.51	81.5	Unknown	IL-18	LPS+Theacrine+SCC
D07	FAM	18.5	79	Unknown	IL-18	LPS+Theacrine+SCC
D08	FAM	18.52	80	Unknown	IL-18	LPS+Theacrine+SCC
